# Supplementary material
Source: publisher site journal article supplement (https://www.dovepress.com/article/594793)
Supplement: Supplementary file 1 [file 594793_Supplementary%20Material.docx]

Supplementary Table 1. Primer sequences used for RT-qPCR validation.

| **Target gene** | **Gene symbol** | **Species** | **Primer type** | **Sequence (5' to 3')** |
| --- | --- | --- | --- | --- |
| Glyceraldehyde-3-phosphate dehydrogenase | GAPDH | Human | Forward | TGACTTCAACAGCGACACCCA |
| Reverse | CACCCTGTTGCTGTAGCCAAA |
| Colony-stimulating factor 2 receptor subunit beta | CSF2RB | Human | Forward | CTCCTTTGGCCTATTCTACAAGC |
| Reverse | TGAACAGAGACGATGTATTGGC |
| NIBAN apoptosis regulator 1 | NIBAN1 | Human | Forward | CCACCAAAGACAGTGTCCAGCT |
| Reverse | AAGCGGCTCTTGAGATCCTGCA |
| Toll-like receptor 1 | TLR1 | Human | Forward | CAGCGATGTGTTCGGTTTTCCG |
| Reverse | GATGGGCAAAGCATGTGGACCA |

Abbreviations: RT-qPCR, reverse transcription quantitative polymerase chain reaction; GAPDH, glyceraldehyde-3-phosphate dehydrogenase; CSF2RB, colony-stimulating factor 2 receptor subunit beta; NIBAN1, NIBAN apoptosis regulator 1; TLR1, toll-like receptor 1.

Supplementary Table 2. Statistical comparison of CIBERSORTx-derived immune cell signatures among groups.

| **Immune Cell signature** | **Group 1 (Mean ± SD)** | **Group 2 (Mean ± SD)** | **Pairwise Wilcoxon rank-sum test P value** | **Overall Kruskal-Wallis test P value** |
| --- | --- | --- | --- | --- |
| **B cells naive** | HC(0.09±0.03) | T2DM‑PresC(0.08±0.04) | 0.8 | 0.02 |
| HC(0.09±0.03) | T2DM‑LowC(0.04±0.02) | 4.10E-03 |
| T2DM‑PresC(0.08±0.04) | T2DM‑LowC(0.04±0.02) | 0.04 |
| **B cells memory** | HC(3.7e-3±9.8e-3) | T2DM‑PresC(0.01±1.0e-2) | 0.12 | 8.90E-04 |
| HC(3.7e-3±9.8e-3) | T2DM‑LowC(0.05±0.02) | 2.20E-03 |
| T2DM‑PresC(0.01±1.0e-2) | T2DM‑LowC(0.05±0.02) | 3.30E-03 |
| **Plasma cells** | HC(0.0e+0±0.0e+0) | T2DM‑PresC(0.0e+0±0.0e+0) | NA | NA |
| HC(0.0e+0±0.0e+0) | T2DM‑LowC(0.0e+0±0.0e+0) | NA |
| T2DM‑PresC(0.0e+0±0.0e+0) | T2DM‑LowC(0.0e+0±0.0e+0) | NA |
| **T cells CD8** | HC(0.24±0.09) | T2DM‑PresC(0.15±0.07) | 0.1 | 0.18 |
| HC(0.24±0.09) | T2DM‑LowC(0.18±0.07) | 0.32 |
| T2DM‑PresC(0.15±0.07) | T2DM‑LowC(0.18±0.07) | 0.38 |
| **T cells CD4 naive** | HC(0.03±0.06) | T2DM‑PresC(0.01±0.03) | 0.44 | 0.48 |
| HC(0.03±0.06) | T2DM‑LowC(3.2e-3±6.3e-3) | 0.29 |
| T2DM‑PresC(0.01±0.03) | T2DM‑LowC(3.2e-3±6.3e-3) | 0.94 |
| **T cells CD4 memory resting** | HC(0.03±0.02) | T2DM‑PresC(0.07±0.03) | 0.02 | 8.90E-04 |
| HC(0.03±0.02) | T2DM‑LowC(0.12±0.04) | 5.80E-04 |
| T2DM‑PresC(0.07±0.03) | T2DM‑LowC(0.12±0.04) | 0.01 |
| **T cells CD4 memory activated** | HC(0.04±0.02) | T2DM‑PresC(9.8e-3±9.3e-3) | 7.20E-03 | 0.01 |
| HC(0.04±0.02) | T2DM‑LowC(0.02±0.02) | 0.03 |
| T2DM‑PresC(9.8e-3±9.3e-3) | T2DM‑LowC(0.02±0.02) | 0.61 |
| **T cells follicular helper** | HC(2.4e-3±6.4e-3) | T2DM‑PresC(8.4e-3±8.4e-3) | 0.14 | 0.1 |
| HC(2.4e-3±6.4e-3) | T2DM‑LowC(6.1e-4±1.6e-3) | 1 |
| T2DM‑PresC(8.4e-3±8.4e-3) | T2DM‑LowC(6.1e-4±1.6e-3) | 0.07 |
| **T cells regulatory (Tregs)** | HC(0.02±0.02) | T2DM‑PresC(4.3e-3±7.2e-3) | 0.03 | 0.03 |
| HC(0.02±0.02) | T2DM‑LowC(5.0e-3±7.3e-3) | 0.04 |
| T2DM‑PresC(4.3e-3±7.2e-3) | T2DM‑LowC(5.0e-3±7.3e-3) | 0.89 |
| **T cells gamma delta** | HC(0.0e+0±0.0e+0) | T2DM‑PresC(0.0e+0±0.0e+0) | NA | NA |
| HC(0.0e+0±0.0e+0) | T2DM‑LowC(0.0e+0±0.0e+0) | NA |
| T2DM‑PresC(0.0e+0±0.0e+0) | T2DM‑LowC(0.0e+0±0.0e+0) | NA |
| **NK cells resting** | HC(0.14±0.01) | T2DM‑PresC(0.12±0.02) | 0.03 | 8.10E-03 |
| HC(0.14±0.01) | T2DM‑LowC(0.18±0.04) | 0.05 |
| T2DM‑PresC(0.12±0.02) | T2DM‑LowC(0.18±0.04) | 0.01 |
| **NK cells activated** | HC(0.01±0.02) | T2DM‑PresC(8.0e-4±2.1e-3) | 0.48 | 0.62 |
| HC(0.01±0.02) | T2DM‑LowC(1.6e-3±4.2e-3) | 0.48 |
| T2DM‑PresC(8.0e-4±2.1e-3) | T2DM‑LowC(1.6e-3±4.2e-3) | 1 |
| **Monocytes** | HC(0.14±0.06) | T2DM‑PresC(0.20±0.14) | 0.71 | 0.02 |
| HC(0.14±0.06) | T2DM‑LowC(0.37±0.13) | 2.30E-03 |
| T2DM‑PresC(0.20±0.14) | T2DM‑LowC(0.37±0.13) | 0.07 |
| **Macrophages M0** | HC(2.3e-5±6.1e-5) | T2DM‑PresC(0.0e+0±0.0e+0) | 0.39 | 0.37 |
| HC(2.3e-5±6.1e-5) | T2DM‑LowC(0.0e+0±0.0e+0) | 0.39 |
| T2DM‑PresC(0.0e+0±0.0e+0) | T2DM‑LowC(0.0e+0±0.0e+0) | NA |
| **Macrophages M1** | HC(9.2e-5±2.0e-4) | T2DM‑PresC(2.8e-4±7.5e-4) | 0.72 | 0.36 |
| HC(9.2e-5±2.0e-4) | T2DM‑LowC(0.0e+0±0.0e+0) | 0.17 |
| T2DM‑PresC(2.8e-4±7.5e-4) | T2DM‑LowC(0.0e+0±0.0e+0) | 0.39 |
| **Macrophages M2** | HC(0.01±9.8e-3) | T2DM‑PresC(0.03±0.02) | 0.18 | 0.24 |
| HC(0.01±9.8e-3) | T2DM‑LowC(0.01±0.01) | 0.8 |
| T2DM‑PresC(0.03±0.02) | T2DM‑LowC(0.01±0.01) | 0.16 |
| **Dendritic cells resting** | HC(0.0e+0±0.0e+0) | T2DM‑PresC(0.0e+0±0.0e+0) | NA | NA |
| HC(0.0e+0±0.0e+0) | T2DM‑LowC(0.0e+0±0.0e+0) | NA |
| T2DM‑PresC(0.0e+0±0.0e+0) | T2DM‑LowC(0.0e+0±0.0e+0) | NA |
| **Dendritic cells activated** | HC(2.4e-3±5.5e-3) | T2DM‑PresC(1.7e-3±4.4e-3) | 0.59 | 0.68 |
| HC(2.4e-3±5.5e-3) | T2DM‑LowC(2.0e-5±5.4e-5) | 0.48 |
| T2DM‑PresC(1.7e-3±4.4e-3) | T2DM‑LowC(2.0e-5±5.4e-5) | 1 |
| **Mast cells resting** | HC(3.1e-3±8.2e-3) | T2DM‑PresC(0.02±6.5e-3) | 5.20E-03 | 3.10E-03 |
| HC(3.1e-3±8.2e-3) | T2DM‑LowC(8.3e-3±7.5e-3) | 0.06 |
| T2DM‑PresC(0.02±6.5e-3) | T2DM‑LowC(8.3e-3±7.5e-3) | 0.01 |
| **Mast cells activated** | HC(0.01±0.01) | T2DM‑PresC(0.0e+0±0.0e+0) | 0.01 | 2.20E-03 |
| HC(0.01±0.01) | T2DM‑LowC(0.0e+0±0.0e+0) | 0.01 |
| T2DM‑PresC(0.0e+0±0.0e+0) | T2DM‑LowC(0.0e+0±0.0e+0) | NA |
| **Eosinophils** | HC(0.01±0.01) | T2DM‑PresC(0.0e+0±0.0e+0) | 0.03 | 9.60E-03 |
| HC(0.01±0.01) | T2DM‑LowC(0.0e+0±0.0e+0) | 0.03 |
| T2DM‑PresC(0.0e+0±0.0e+0) | T2DM‑LowC(0.0e+0±0.0e+0) | NA |
| **Neutrophils** | HC(0.21±0.20) | T2DM‑PresC(0.30±0.16) | 0.46 | 5.80E-03 |
| HC(0.21±0.20) | T2DM‑LowC(0.02±0.03) | 0.04 |
| T2DM‑PresC(0.30±0.16) | T2DM‑LowC(0.02±0.03) | 1.90E-03 |

The table summarizes CIBERSORTx-derived estimates of 22 LM22 immune cell signatures from the RNA-seq cohort. Pairwise comparisons between groups (HC vs. T2DM-PresC, HC vs. T2DM-LowC, and T2DM-PresC vs. T2DM-LowC) were conducted using the Wilcoxon rank-sum test, and overall between-group differences were assessed using the Kruskal-Wallis test. Data are presented as mean ± standard deviation of the estimated relative proportions. Exact P-values are reported for pairwise Wilcoxon tests and overall Kruskal-Wallis tests. NA indicates non-estimable comparisons due to all-zero or near-zero distributions. Bold row labels indicate immune cell signatures. Because these values are CIBERSORTx-derived estimates from PBMC transcriptomes, low-abundance signatures should be interpreted cautiously.

Abbreviations: HC, healthy control; T2DM-PresC, type 2 diabetes with preserved C-peptide; T2DM-LowC, type 2 diabetes with low C-peptide; SD, standard deviation; PBMC, peripheral blood mononuclear cell; RNA-seq, RNA sequencing; LM22, leukocyte gene signature matrix 22; NA, not estimable.

Supplementary Figure S1. Participant flow diagram (RECORD).


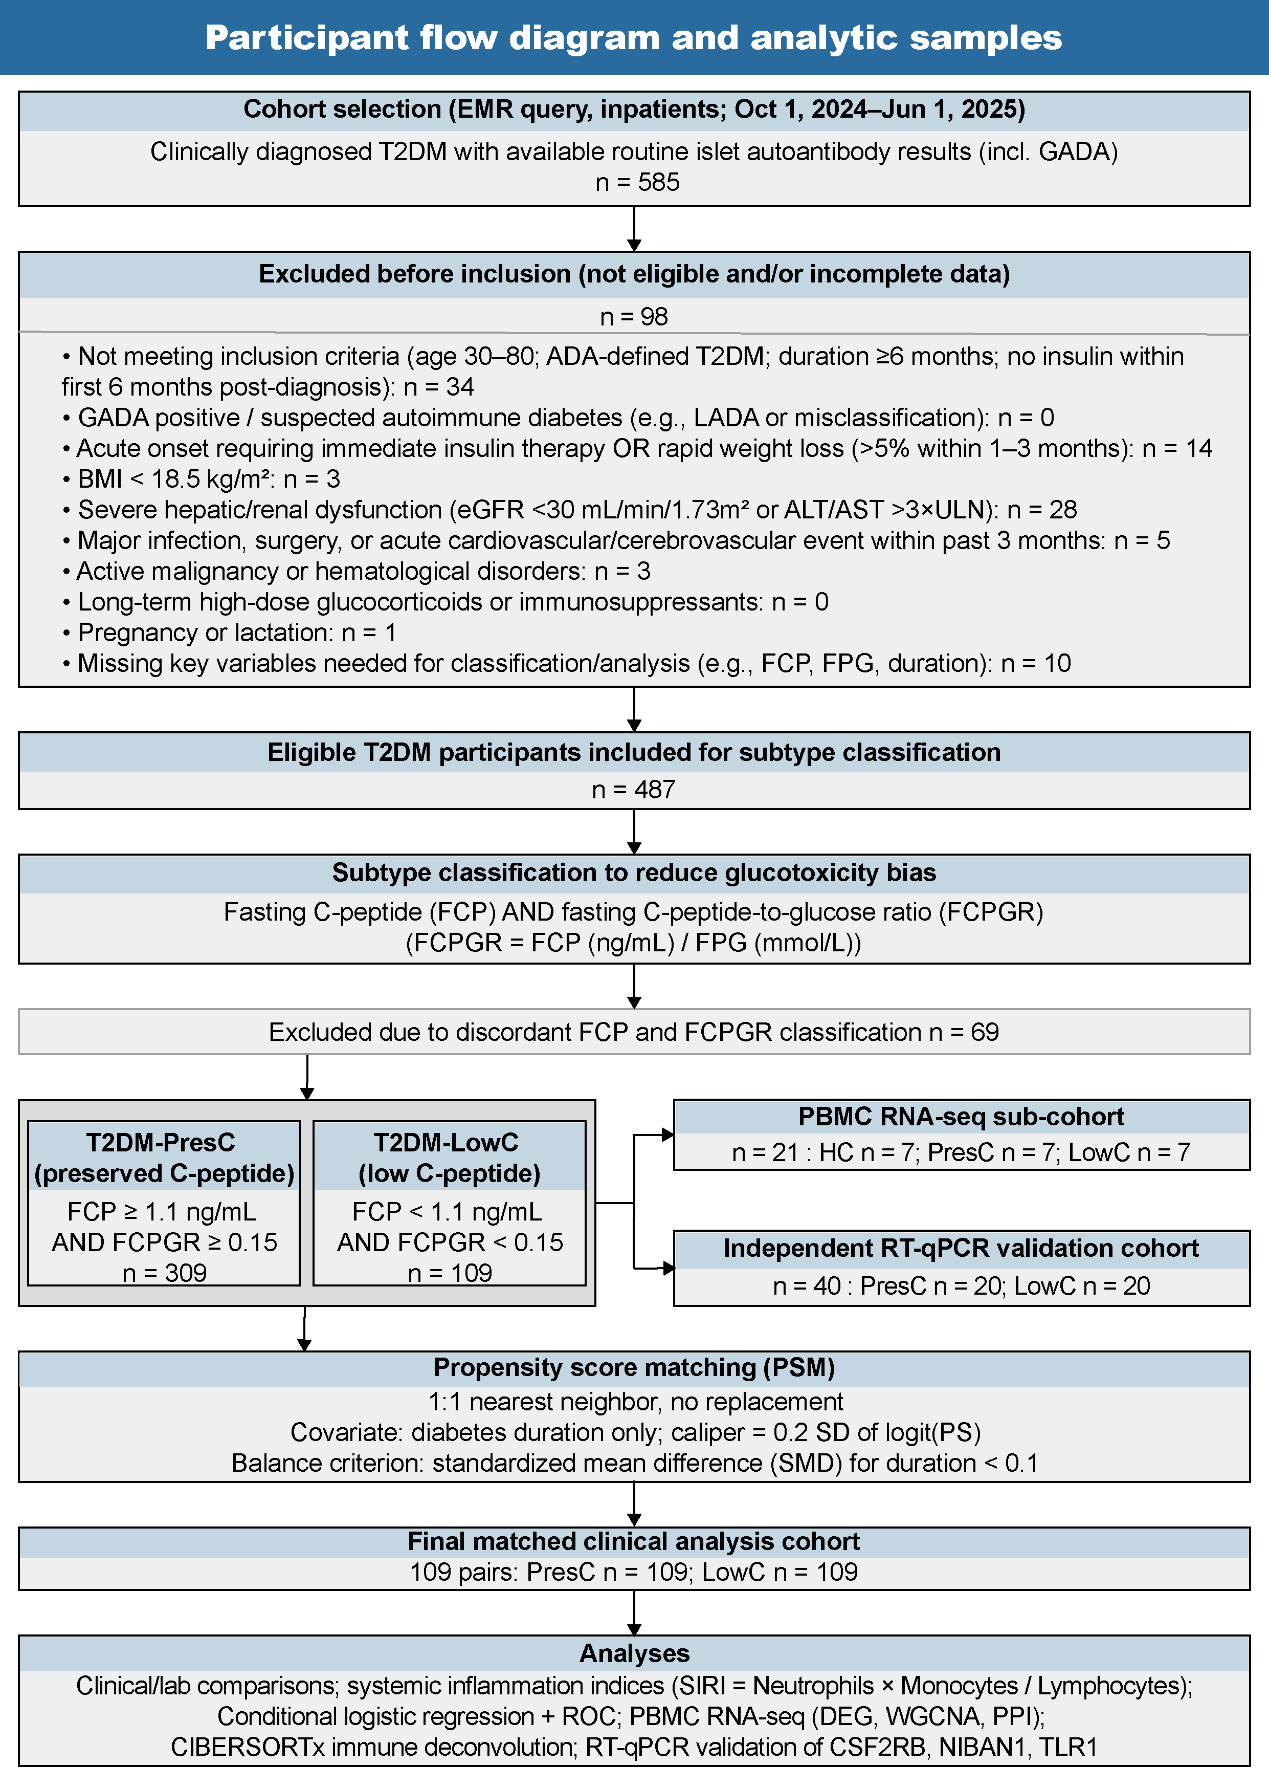
Inpatient EMR were queried between October 1, 2024 and June 1, 2025 to identify clinically diagnosed T2DM patients with available routine islet autoantibody results (including GADA) (n = 585). After applying clinical eligibility criteria (n = 98 excluded) and removing discordant FCP/FCPGR phenotypes (n = 69 excluded), n = 418 participants remained for subtype classification (PresC n = 309; LowC n = 109). PSM (1:1) was performed using diabetes duration as the sole covariate, yielding 109 matched pairs (PresC n = 109; LowC n = 109) for the main clinical analyses. Sub-studies included a PBMC RNA-seq cohort (n = 21; HC n = 7, PresC n = 7, LowC n = 7) and an independent RT-qPCR validation cohort (n = 40; PresC n = 20, LowC n = 20).

Abbreviations: RECORD, REporting of studies Conducted using Observational Routinely-collected health Data; EMR, electronic medical record; T2DM, type 2 diabetes mellitus; GADA, glutamic acid decarboxylase antibody; FCP, fasting C-peptide; FCPGR, fasting C-peptide-to-glucose ratio; PresC, preserved C-peptide; LowC, low C-peptide; PSM, propensity score matching; PBMC, peripheral blood mononuclear cell; HC, healthy controls; RNA-seq, RNA sequencing; RT-qPCR, reverse transcription quantitative polymerase chain reaction; SIRI, systemic inflammation response index.

Supplementary Figure S2. FDR-based sensitivity analysis of differential gene expression among the three groups.


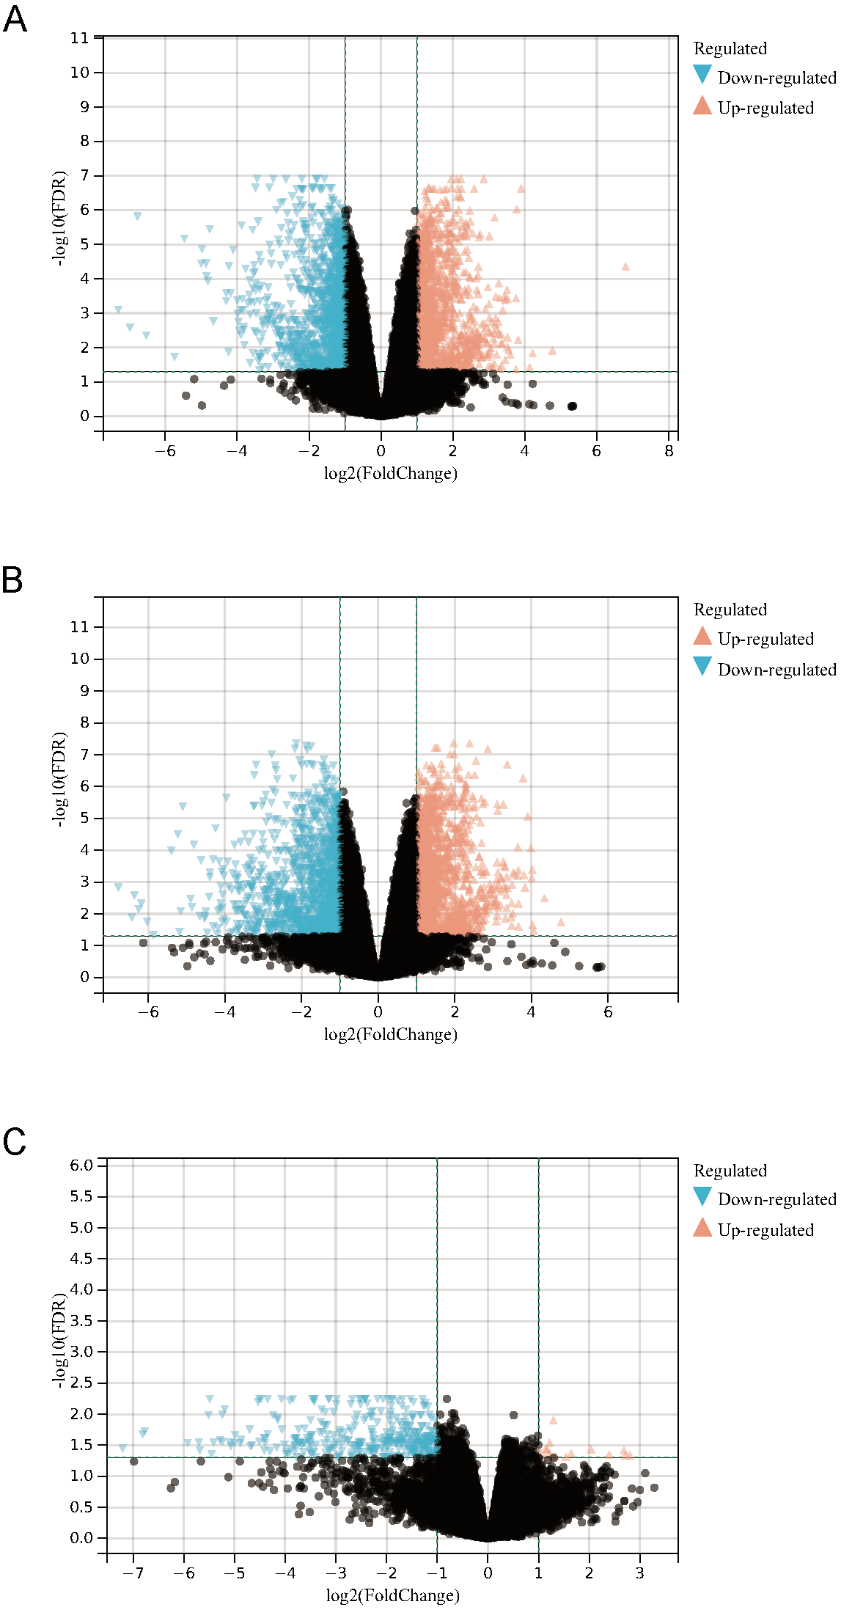


Volcano plots displaying FDR-based differential expression results from the RNA-seq analysis of PBMCs. The x-axis represents log2(FC), and the y-axis represents -log10(FDR). Each dot represents a gene. Genes with FDR < 0.05 and FC ≥ 2 are highlighted as significantly upregulated (red) or downregulated (blue). These plots are provided as sensitivity analyses for the exploratory raw P-value volcano plots shown in Figure 3.

(A) Comparison between T2DM-PresC and HC.

(B) Comparison between T2DM-LowC and HC.

(C) Comparison between T2DM-LowC and T2DM-PresC.

Abbreviations: DEGs, differentially expressed genes; RNA-seq, RNA sequencing; PBMCs, peripheral blood mononuclear cells; FC, fold change; FDR, false discovery rate, adjusted by the Benjamini-Hochberg method; T2DM-PresC, type 2 diabetes with preserved C-peptide; T2DM-LowC, type 2 diabetes with low C-peptide; HC, healthy control.

Supplementary Dataset S1. Complete differential gene-expression results for the T2DM-PresC vs HC comparison.

This dataset contains the complete output from the limma-voom differential expression analysis for the comparison between the Healthy Control (HC) and T2DM-PresC groups, based on the RNA-seq data from PBMCs. The table includes statistical metrics for all genes analyzed. The columns are as follows:

Tag: Gene identifier, including official gene symbols and novel transcript IDs from StringTie (e.g., MSTRG...).

logFC: log2(Fold Change) of gene expression (T2DM-PresC relative to HC).

AveExpr: Average log2 expression level of the gene across all samples.

t: Moderated t-statistic from the limma analysis.

P. Value: Raw (unadjusted) P-value.

adj.P.Val: Adjusted P-value using the Benjamini-Hochberg method (False Discovery Rate, FDR).

B: B-statistic (log-odds) indicating the likelihood of differential expression.

Supplementary Dataset S2. Complete differential gene-expression results for the T2DM-LowC vs HC comparison.

This dataset contains the complete output from the limma-voom differential expression analysis for the comparison between the Healthy Control (HC) and T2DM-LowC groups. Column definitions are the same as in Supplementary Dataset S1, with logFC representing the expression change in T2DM-LowC relative to HC.

Supplementary Dataset S3. Complete differential gene-expression results for the T2DM-LowC vs T2DM-PresC comparison.

This dataset contains the complete output from the limma-voom differential expression analysis for the comparison between the T2DM-PresC and T2DM-LowC groups. Column definitions are the same as in Supplementary Dataset S1, with logFC representing the expression change in T2DM-LowC relative to T2DM-PresC.

Supplementary Dataset S4. Raw CIBERSORTx deconvolution results for all samples.

This dataset contains the complete output from the CIBERSORTx algorithm, using the LM22 signature matrix, for all 21 samples in the RNA-seq cohort (HC, T2DM-PresC, and T2DM-LowC). The rows represent individual samples, and the columns represent the estimated relative proportions of the 22 immune cell subpopulations. The final three columns show the P-value for the deconvolution significance, the Pearson correlation coefficient between the sample's expression profile and the signature matrix, and the Root Mean Squared Error (RMSE) of the deconvolution fit for each sample.

Supplementary Datasets S1–S4 are provided in a single accompanying machine-readable workbook containing complete differential-expression outputs (S1–S3) and raw CIBERSORTx deconvolution results (S4).

Abbreviations: HC, healthy control; T2DM-PresC, type 2 diabetes with preserved C-peptide; T2DM-LowC, type 2 diabetes with low C-peptide; RNA-seq, RNA sequencing; PBMCs, peripheral blood mononuclear cells; FDR, false discovery rate; RMSE, root mean squared error; LM22, leukocyte gene signature matrix 22.
